# Supplementary material for: Inverse opal structured Pt/TiO2–MnOy photothermocatalysts for enhanced toluene degradation activity
Source: Royal Society of Chemistry journal article supplement (doi:10.1039/d4ta03123g), 2024-01-01
Supplement: d4ta03123g1.pdf [file d4ta03123g1.pdf]

## Supplementary Information

### **Inverse opal structured Pt/TiO<sub>2</sub>-MnO<sub>y</sub> photothermocatalyst for enhanced toluene degradation activity**

Zhili Chi, Zhiyong Liu, Wenbo Liu, Jiaqi Cai, Yiyang Zhang, Yangmei Dai, Jinlong Zhang,  
Ziwei Ye\*, Baozhu Tian\*

Shanghai Engineering Research Center for Multi-media Environmental Catalysis and Resource Utilization, Key Laboratory for Advanced Materials and Joint International Research Laboratory of Precision Chemistry and Molecular Engineering, Feringa Nobel Prize Scientist Joint Research Center, Key Laboratory of Specially Functional Polymeric Materials and Related Technology (Ministry of Education), School of Chemistry and Molecular Engineering, East China University of Science and Technology, 130 Meilong Road, Shanghai 200237, PR China

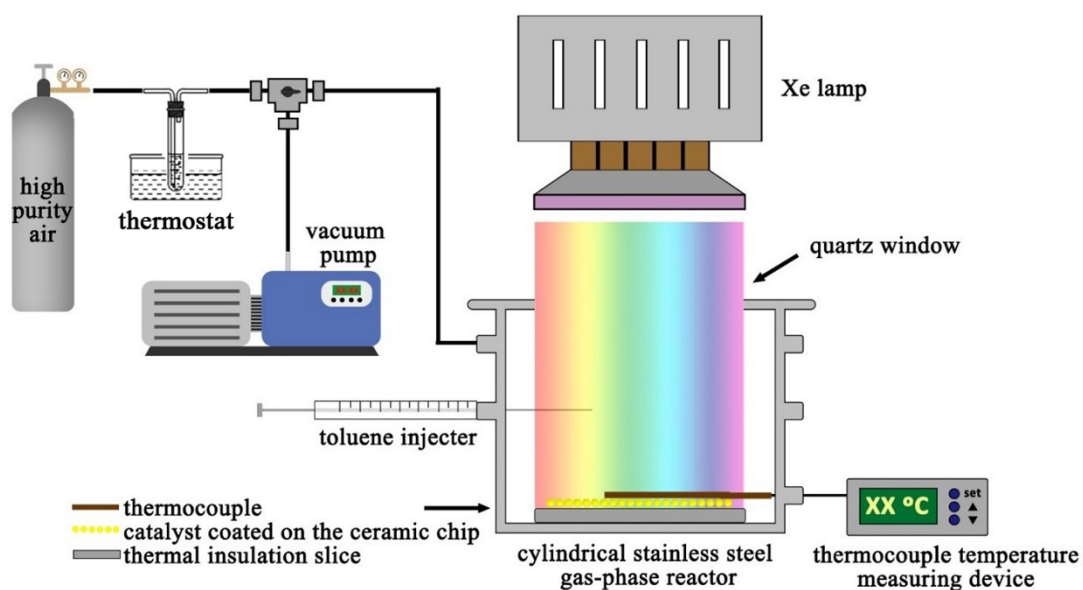

**Fig. S1.** Schematic diagram of the photothermocatalytic setup.

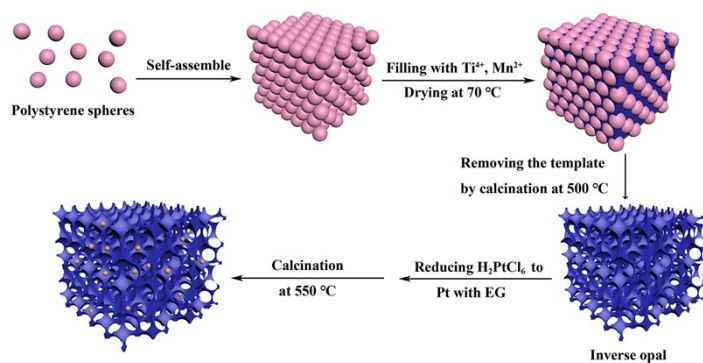

**Fig. S2.** Synthetic route for TM-x and Pt/TM-x.

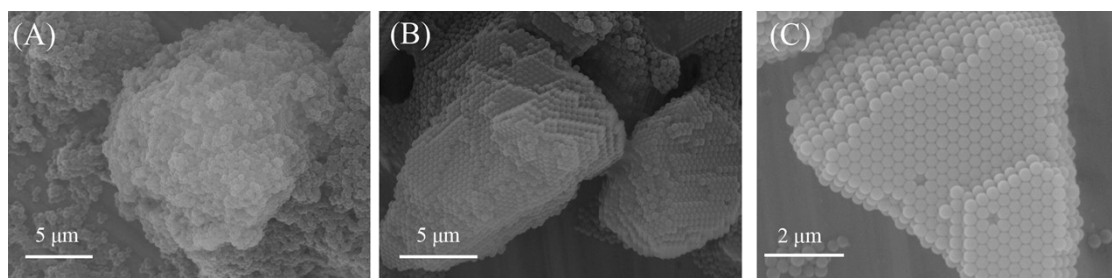

**Fig. S3.** (A-C) SEM images of the PS template.

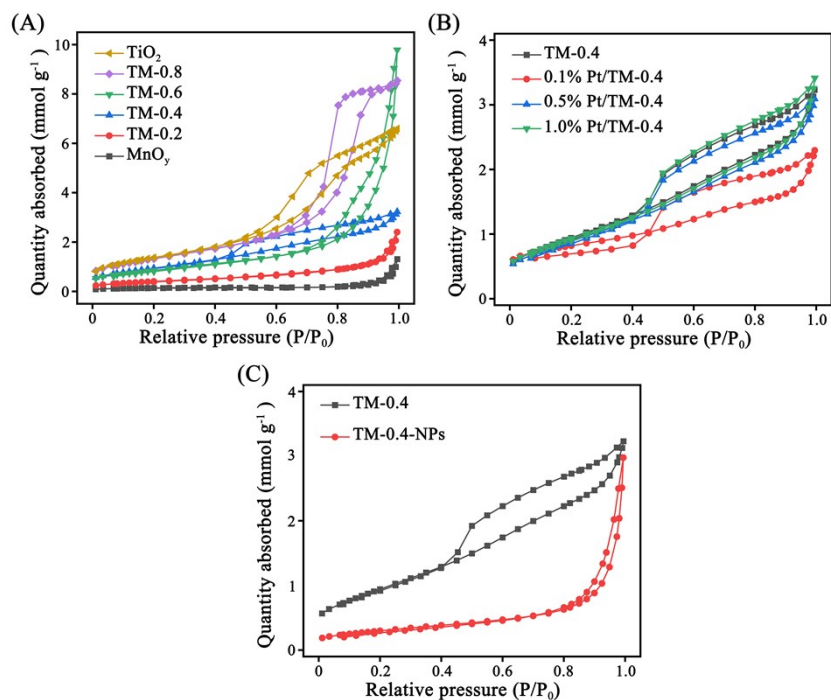

**Fig. S4.** (A) Nitrogen adsorption–desorption isotherms of TiO<sub>2</sub>, TM-x, and MnO<sub>y</sub>. (B) Nitrogen adsorption–desorption isotherms of TM-0.4 and Pt/TM-0.4 with different Pt loadings. (C) Nitrogen adsorption–desorption isotherms of TM-0.4 and TM-0.4-NPs.

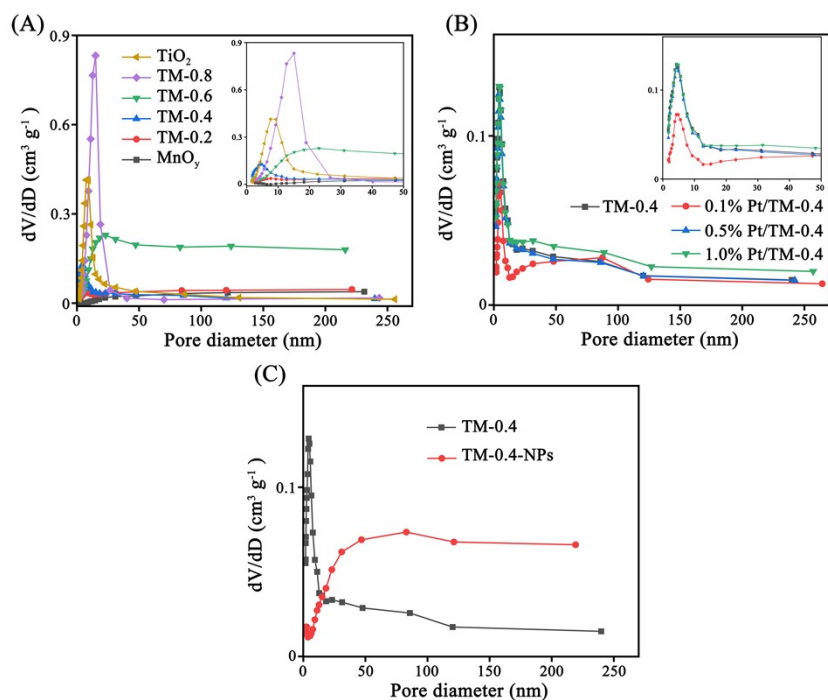

**Fig. S5** (A) Pore size distribution curves of TiO<sub>2</sub>, TM-x, and MnO<sub>y</sub>. (B) Pore size distribution curves of TM-0.4 and Pt/TM-0.4 with different Pt loadings. (C) Pore size distribution curves of TM-0.4 and TM-0.4-NPs.

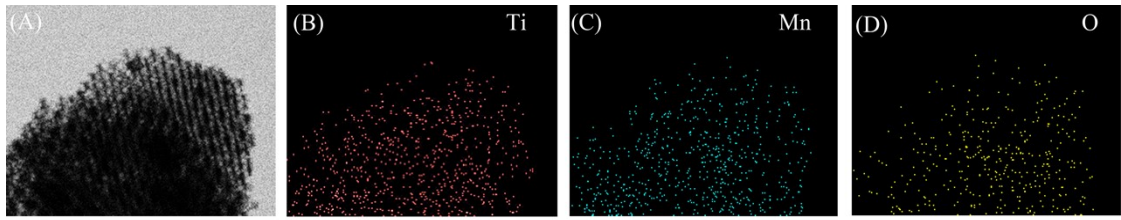

**Fig. S6.** (A-D) EDX element mapping diagrams of TM-0.4.

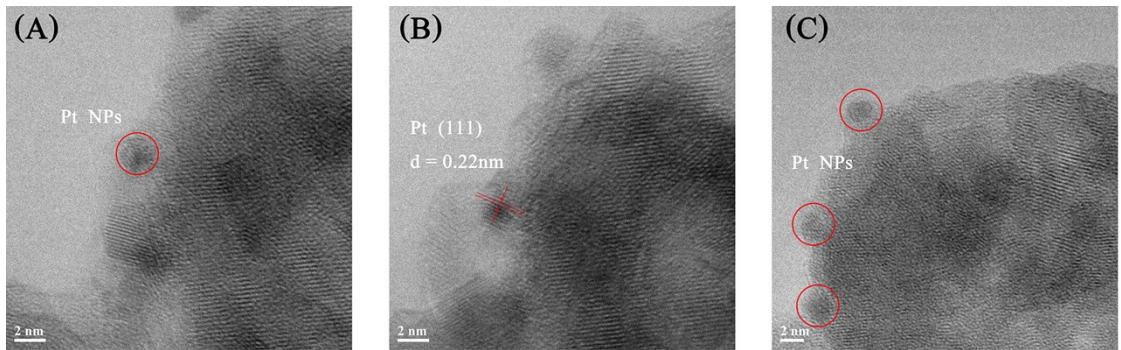

**Fig. S7.** (A-C) HR-TEM images of (A) 0.1% Pt/TM-0.4, (B) 0.5% Pt/TM-0.4, and (C) 1.0% Pt/TM-0.4.

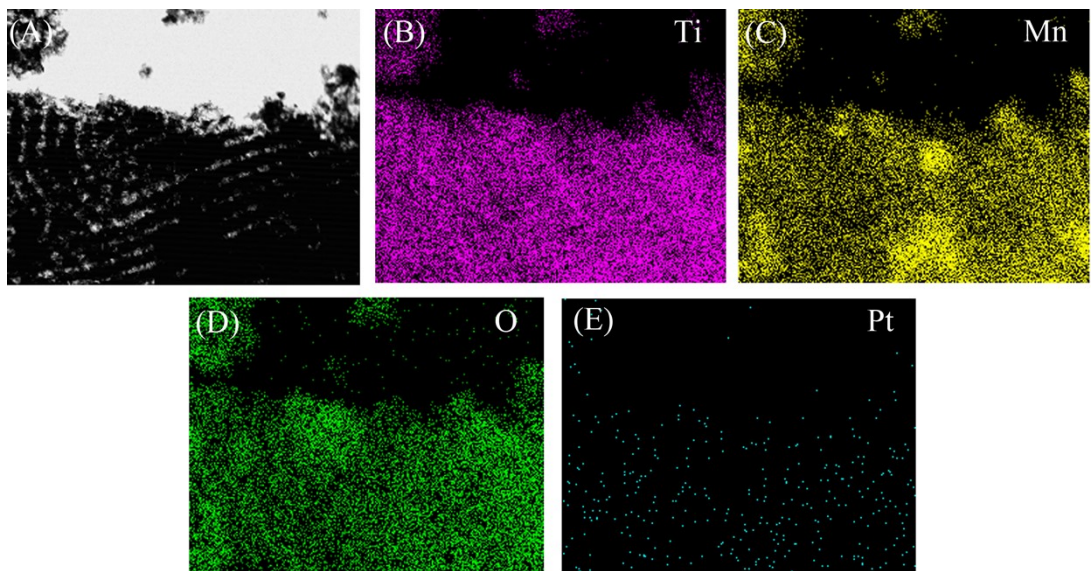

**Fig. S8.** (A) HR-TEM and (B-E) EDX element mapping images of 0.5%Pt/TM-0.4.

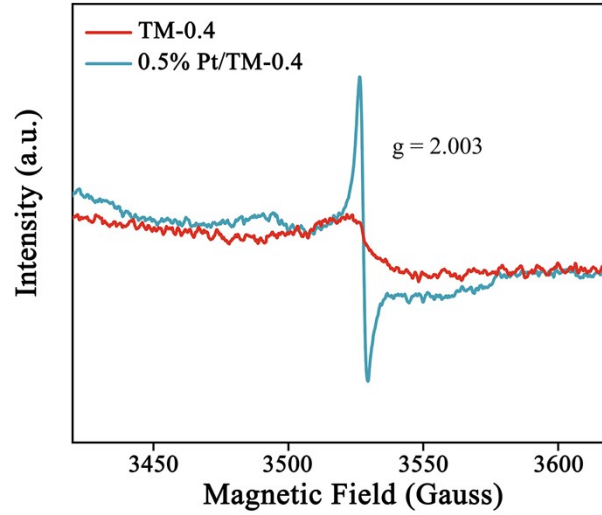

**Fig. S9.** EPR spectra of TM-0.4 and 0.5% Pt/TM-0.4.

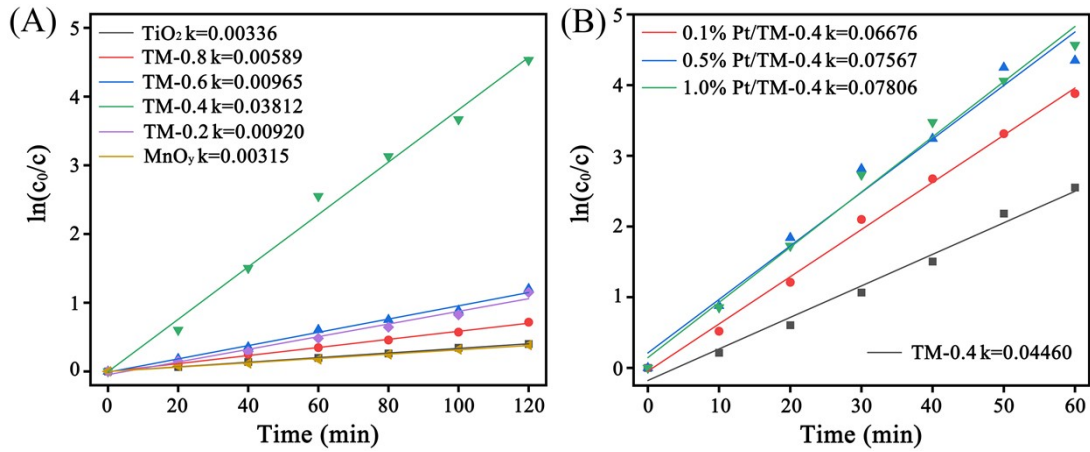

**Fig. S10.** (A) Kinetic curves of  $\text{TiO}_2$ , TM-x, and  $\text{MnO}_y$ . (B) Kinetic curves of TM-0.4 and Pt/TM-0.4 with different Pt loadings.

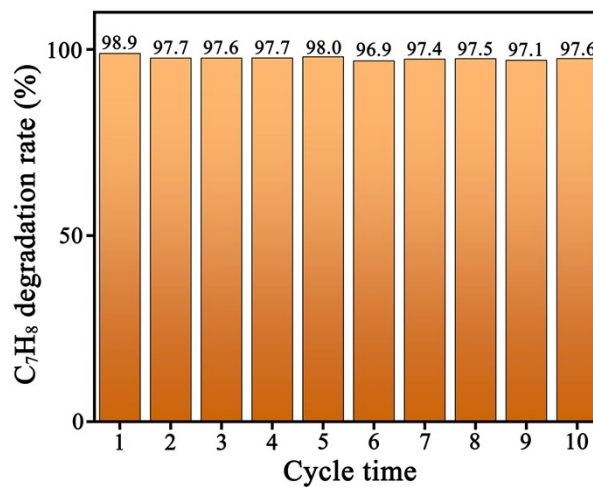

**Fig. S11.** Cycling degradation tests for TM-0.4.

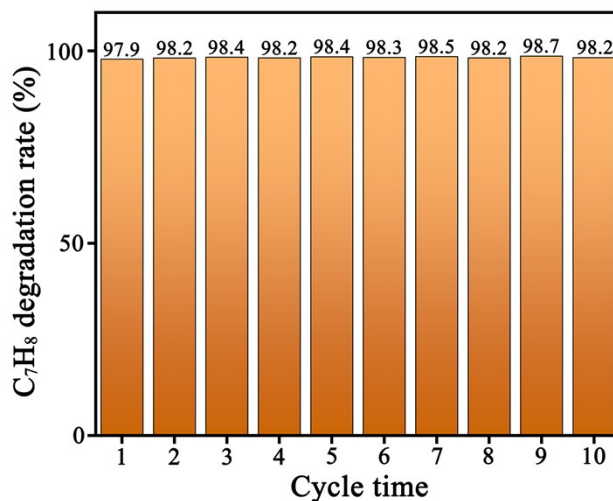

**Fig. S12.** Cycling degradation tests for 0.5% Pt/TM-0.4.

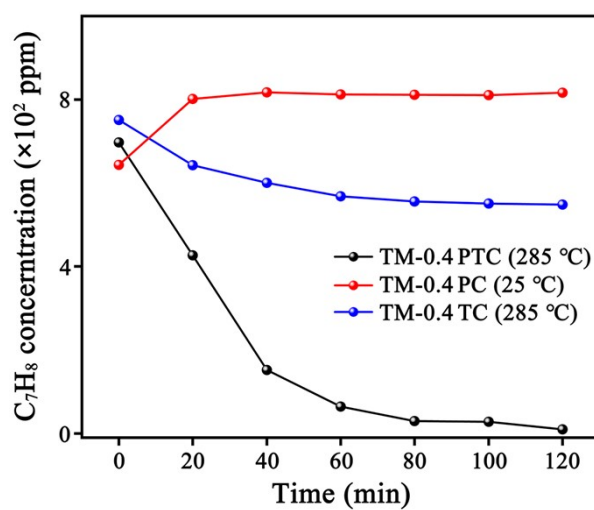

**Fig. S13.** Concentration change of toluene under the PTC, TC and PC conditions for TM-0.4.

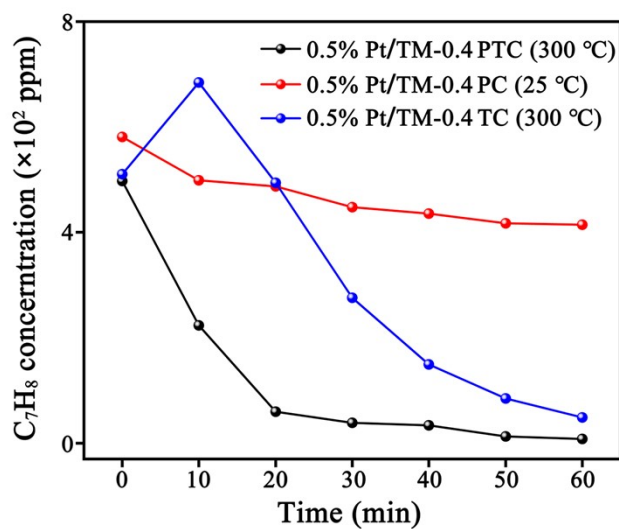

**Fig. S14.** Concentration change of toluene under the PTC, TC and PC condition for 0.5% Pt/TM-0.4.

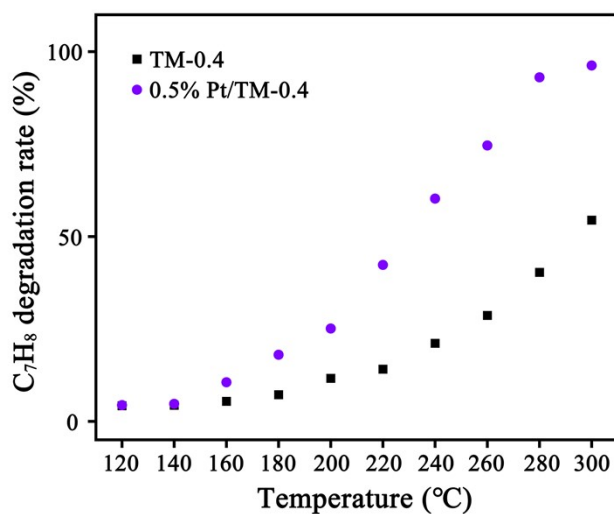

**Fig. S15.** TC degradation rates of toluene for TM-0.4 and 0.5% Pt/TM-0.4 at different temperatures.

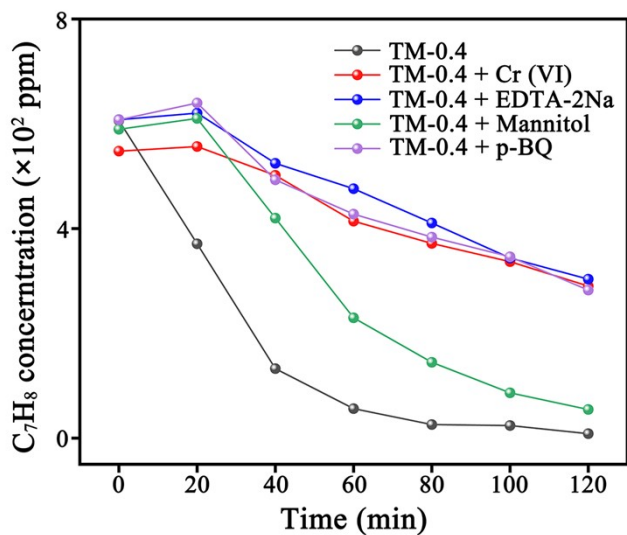

**Fig. S16.** Concentration change of toluene under Xe lamp illumination for TM-0.4 mixed with  $K_2Cr_2O_7$ , EDTA-2Na, mannitol and p-BQ.

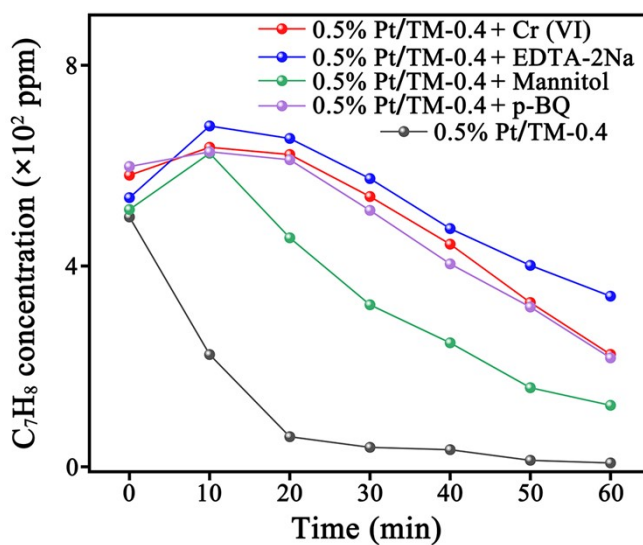

**Fig. S17.** Concentration change of toluene under Xe lamp illumination for 0.5% Pt/TM-0.4 mixed with  $K_2Cr_2O_7$ , EDTA-2Na, mannitol and p-BQ.



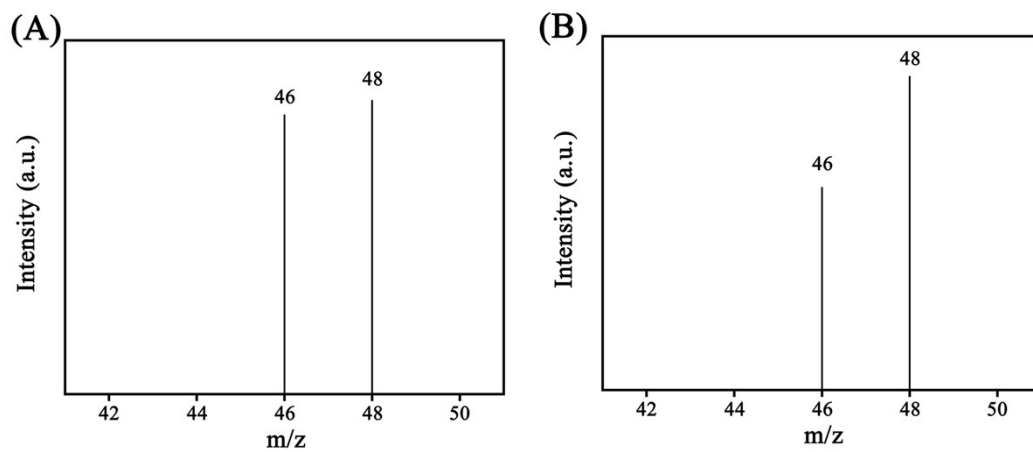

**Fig. S18.** GC-MS spectra of the gas mixture extracted at 60 min in the presence of (A) TM-0.4 and (B) 0.5% Pt/TM-0.4.

**Table S1.** BET surface areas of the different samples

| Sample           | BET surface area (m <sup>2</sup> /g) |
|------------------|--------------------------------------|
| TiO <sub>2</sub> | 110.7120                             |
| TM-0.8           | 108.3551                             |
| TM-0.6           | 79.1883                              |
| TM-0.4           | 69.6200                              |
| TM-0.2           | 32.8527                              |
| MnO <sub>y</sub> | 10.7281                              |
| TM-0.4-NPs       | 24.0182                              |
| 0.1% Pt/TM-0.4   | 69.9248                              |
| 0.5% Pt/TM-0.4   | 69.3475                              |
| 1.0% Pt/TM-0.4   | 67.1345                              |

**Table S2.** Surface temperature of different samples after light irradiation for 5 min.

| Sample           | Surface temperature (°C) |
|------------------|--------------------------|
| TiO <sub>2</sub> | 186                      |
| TM-0.8           | 260                      |
| TM-0.6           | 280                      |
| TM-0.4           | 285                      |
| TM-0.2           | 299                      |
| MnO <sub>y</sub> | 252                      |
| 0.1% Pt/TM-0.4   | 291                      |
| 0.5% Pt/TM-0.4   | 300                      |
| 1.0% Pt/TM-0.4   | 311                      |

**Table S3.** Comparison of photothermocatalytic activity for toluene degradation reported in the previous literatures [1–11].

| Catalysts                                                                                                 | Toluene concentration /ppm | Toluene Conversion rate                               | light                                    | Ref.      |
|-----------------------------------------------------------------------------------------------------------|----------------------------|-------------------------------------------------------|------------------------------------------|-----------|
| TM-0.4 (50 mg)                                                                                            | 1150                       | 97.1% 60 min                                          | 300W Xe lamp                             | This work |
| 0.5% Pt/TM-0.4 (50 mg)                                                                                    | 1150                       | 97.4% 30 min                                          | 300W Xe lamp                             | This work |
| Mn-TiO <sub>2</sub> (100 mg)                                                                              | 278                        | 56.4% 160 min                                         | 300W Osram lamp                          | 1         |
| Nanodiamond-decorated ZnO (100 mg)                                                                        | 50                         | 100% 120 min                                          | 50W Xe lamp with Band-Pass UV-365 filter | 2         |
| TiO <sub>2</sub> coupling 2.0 wt% Pt with 1.0 wt% MoS <sub>2</sub> (50 mg)                                | 50                         | 91.5% 25min                                           | 300W Xe lamp                             | 3         |
| 0.7% Fe-TiO <sub>2</sub> (1200 mg)                                                                        | 370                        | 96.5% 120 min                                         | 300W Xe-arc lamp                         | 4         |
| TiBi <sub>1.9%</sub> Zn <sub>1%</sub> O <sub>2</sub> (100 mg)                                             | 280                        | 93% 200 min                                           | 300W Xe lamp                             | 5         |
| Pt/SrTiO <sub>3</sub> (200mg)                                                                             | 700                        | 100% 60 min                                           | 300W Xe lamp                             | 6         |
| Pt/SrTiO <sub>3</sub> (200 mg)                                                                            | 700                        | 100% 120 min                                          | 150 °C                                   | 6         |
| SiO <sub>2</sub> @Pt@ZrO <sub>2</sub> (0.3 wt% Pt) (200 mg)                                               | 800                        | 100% 60 min                                           | 300W Xe lamp                             | 7         |
| SiO <sub>2</sub> @Pt@ZrO <sub>2</sub> (0.3 wt% Pt) (200 mg)                                               | 800                        | 80% 60 min                                            | 150 °C                                   | 7         |
| Co <sub>3</sub> O <sub>4</sub> /TiO <sub>2</sub> (Co/Ti ratio, 0.30) (100 mg)                             | 800 (benzene)              | 95% 40 min                                            | 500W Xe lamp                             | 8         |
| 1% Pt-rGO-TiO <sub>2</sub> (100 mg)                                                                       | 200                        | 95% 90 min (toluene)<br>72% 90 min (CO <sub>2</sub> ) | 150 °C                                   | 9         |
| Co <sub>3</sub> O <sub>4</sub> /TiO <sub>2</sub> treated with H <sub>2</sub> (Co/Ti ratio, 0.30) (100 mg) | 200                        | 90%                                                   | 170 °C 300W Xe lamp                      | 10        |
| Ag/Ag <sub>3</sub> PO <sub>4</sub> /CeO <sub>2</sub>                                                      | 600 (benzene)              | 10% 180 min                                           | 135 °C                                   | 11        |
|                                                                                                           | 600 (benzene)              | 90.18% 180 min                                        | 300W Xe lamp                             |           |
| TiO <sub>2</sub> (500 mg)                                                                                 | 76.5 (benzene)             | 100% 60 min                                           | UV lamp                                  | 12        |
|                                                                                                           |                            | 16.3% 60 min                                          | 240 °C                                   |           |
| 0.1 wt% Pt/TiO <sub>2</sub> (500 mg)                                                                      | 76.5(benzene)              | 100% 30 min                                           | UV lamp                                  | 12        |
|                                                                                                           |                            | ~90% 60 min                                           | 240 °C                                   |           |

## Reference

- 1 V. Binas, V. Stefanopoulos, G. Kiriakidis and P. Papagiannakopoulos, *J. Materiomics*, 2019, **5**, 56-65.
- 2 J. Liu, P. Wang, W. Qu, H. Li, L. Shi and D. Zhang, *Appl. Catal., B*, 2019, **257**, 11788.
- 3 J. Qu, D. Chen, N. Li, Q. Xu, H. Li, J. He and J. Lu, *Appl. Catal., B*, 2019, **256**, 117877.
- 4 S. Sun, J. Ding, J. Bao, C. Gao, Z. Qi, X. Yang, B. He and C. Li, *Appl. Surf. Sci.*, 2012, **258**, 5031-5037.
- 5 J. Li, S. Cai, Z. Xu, X. Chen, J. Chen, H. Jia and J. Chen, *J. Hazard. Mater.*, 2017, **325**, 261-270.
- 6 X. Yang, S. Liu, J. Li, J. Chen and Z. Rui, *Chemosphere*, 2020, **249**, 126096.
- 7 C. Jiang, H. Wang, S. Lin, F. Ma, Y. Wang and H. Ji, *Ind. Eng. Chem. Res.*, 2019, **58**, 16450-16458.
- 8 Z. Shi, L. Lan, Y. Li, Y. Yang, Q. Zhang, J. Wu, G. Zhang and X. Zhao, *ACS Sustain. Chem. Eng.*, 2018, **6**, 16503-16514.
- 9 J. Li, S. Cai, E. Yu, B. Weng, X. Chen, J. Chen, H. Jia and Y. Xu, *Appl. Catal., B*, 2018, **233**, 260-271.
- 10 Y. Yang, S. Zhao, F. Bi, J. Chen, Y. Li, L. Cui, J. Xu and X. Zhang, *Cell Rep. Phys. Sci.*, 2022, **3**, 101011.
- 11 B. Borjigin, L. Ding, H. Li and X. Wang, *Chem. Eng. J.*, 2020, **402**, 126070.
- 12 Y. Li, J. Huang, T. Peng, J. Xu and X. Zhao, *ChemCatChem*, 2010, **2**, 1082-1087.
